# Supplementary material for: Construction of a CsPbBr3 modified porous g-C3N4 photocatalyst for effective reduction of CO2 and mechanism exploration
Source: Royal Society of Chemistry journal article supplement (doi:10.1039/d0nj04018e), 2021-01-01
Supplement: d0nj04018e1.pdf [file d0nj04018e1.pdf]

## Supporting Information

### Construction of CsPbBr<sub>3</sub> modified porous g-C<sub>3</sub>N<sub>4</sub> photocatalyst for effective reduction of CO<sub>2</sub> and mechanism exploration

Yunqi Wang<sup>a</sup>, Zhixiang Liu<sup>b</sup>, Xu Tang<sup>d</sup>, Pengwei Huo<sup>c</sup>, Zhi Zhu<sup>c\*</sup>, Boting Yang<sup>a\*</sup>, Zhi Liu<sup>e</sup>

a. College of science, Beihua University, Jilin Avenue 15, Jilin, 132013, PR China

b. School of Mechanical and Transportation Engineering, Guangxi University of Science and Technology, Liuzhou 45616, PR China

c. Institute for Advanced Materials, School of Materials Science and Engineering, Jiangsu University, Zhenjiang, 212013, China

d. Institute for Advanced Materials, School of Materials Science, Jiangsu University, Zhenjiang 212013, P.R. China

e. Department of Chemistry, College of Science, Shantou University, Shantou, Guangdong 515063, P. R. China

\*Corresponding authors:

E-mail address: zhuzhi@ujs.edu.cn, ybt199@126.com

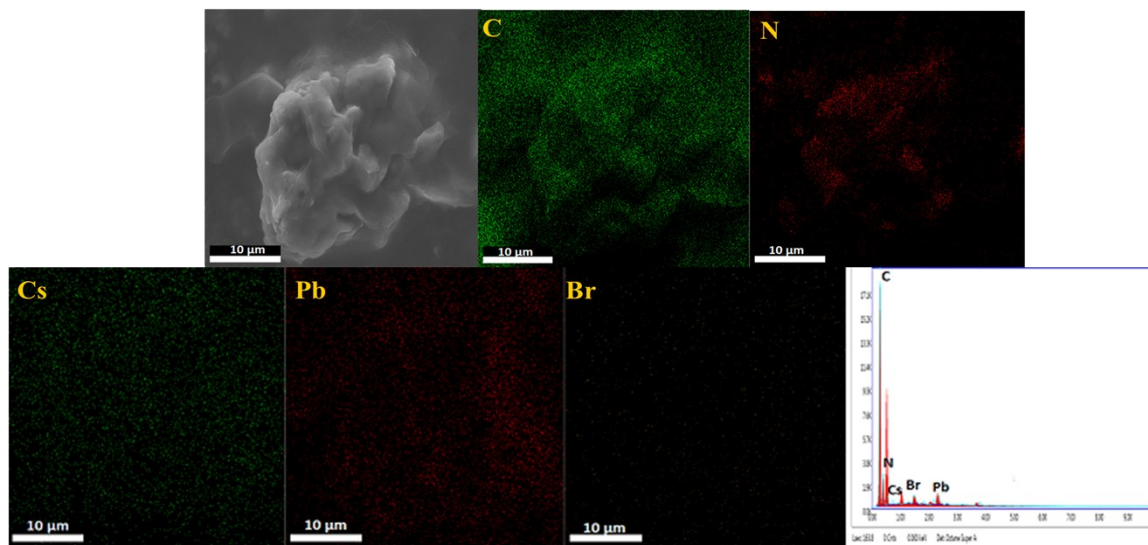

**Fig. S1.** SEM images, the elemental mapping and energy-dispersive X-ray (EDX) spectrum of P-CN/CsPbBr<sub>3</sub>.

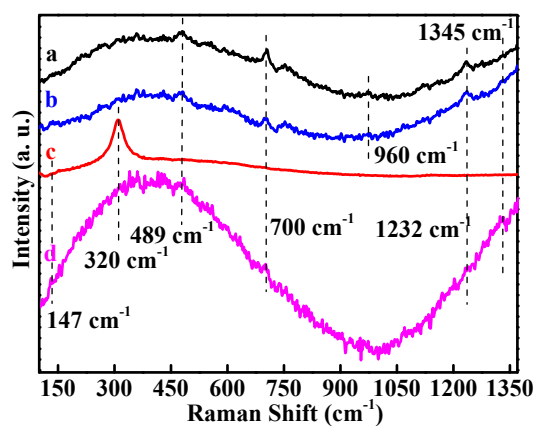

**Fig. S2.** Raman spectra of (a) B-CN, (b) P-CN, (c) CsPbBr<sub>3</sub> and (d) P-CN/CsPbBr<sub>3</sub>.

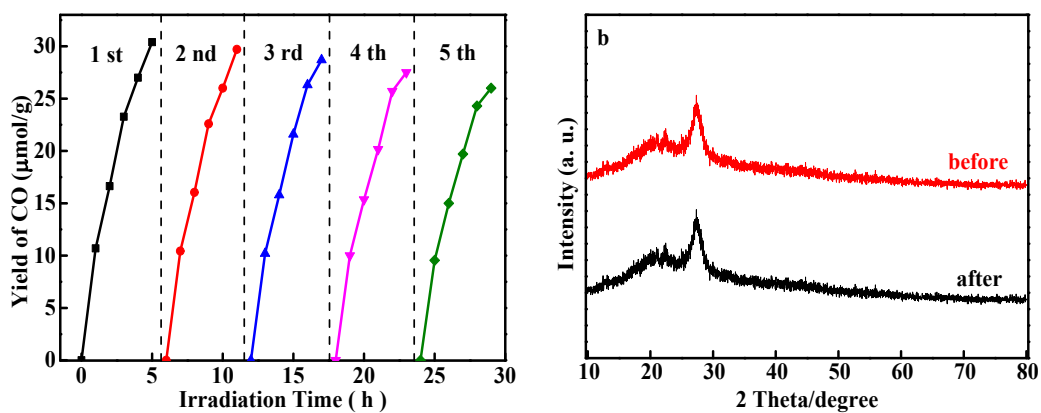

**Fig. S3.** (a) CO<sub>2</sub> reduction cycle diagram, (b) XRD patterns of P-CN/CsPbBr<sub>3-2</sub> before and after five reaction cycles.

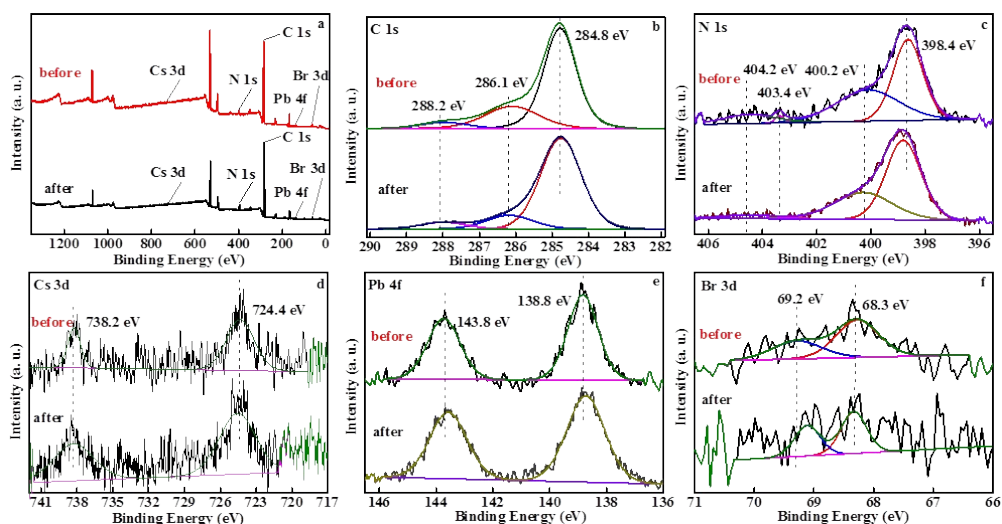

Fig. S4. X-ray photoelectron spectroscopy (XPS) analysis of P-CN/CsPbBr<sub>3</sub>-2 before and after photocatalytic CO<sub>2</sub> reduction.

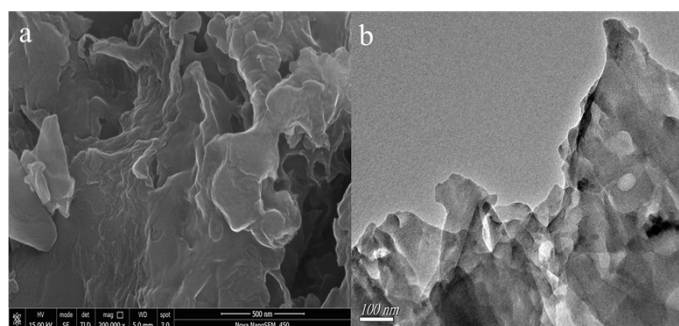

Fig. S5. (a) TEM and (b) FESEM of P-CN/CsPbBr<sub>3</sub>-2 after photocatalytic CO<sub>2</sub> reduction.

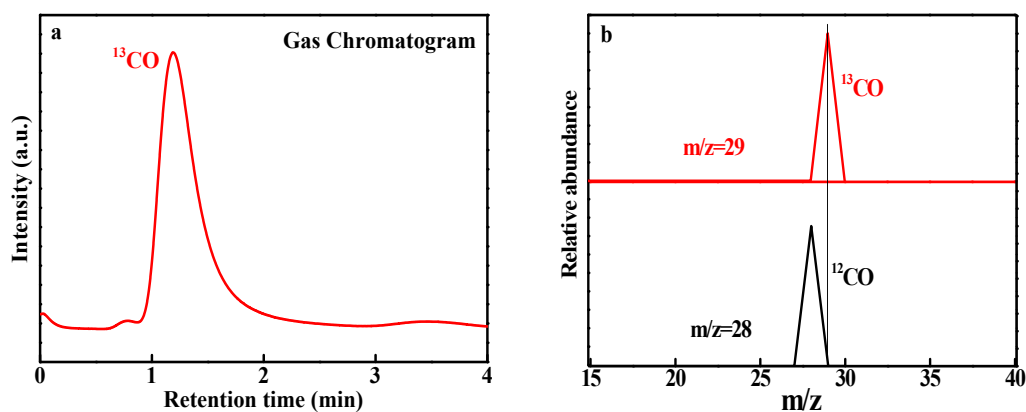

Fig. S6. Gas chromatography-mass spectrometry (GC-MS) analysis of CO generated by P-CN/CsPbBr<sub>3</sub>.

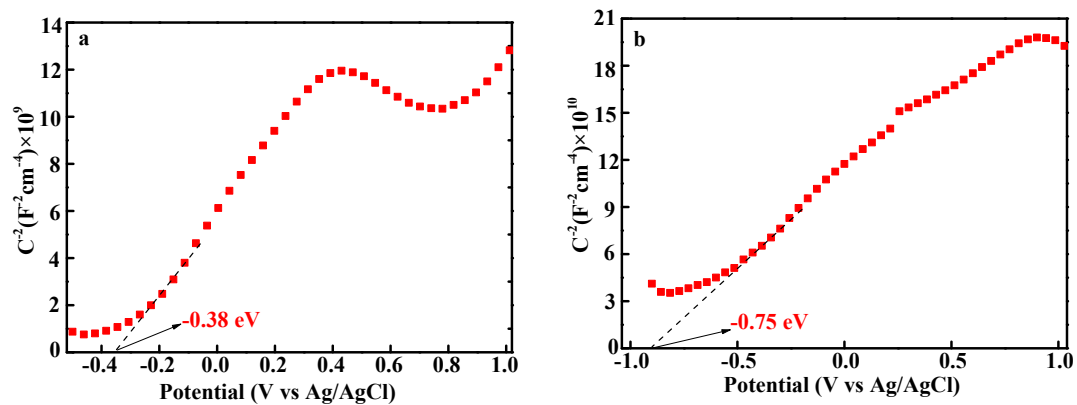

Fig. S7. Mott-Schottky plots of (a) P-CN and (b) CsPbBr<sub>3</sub>.

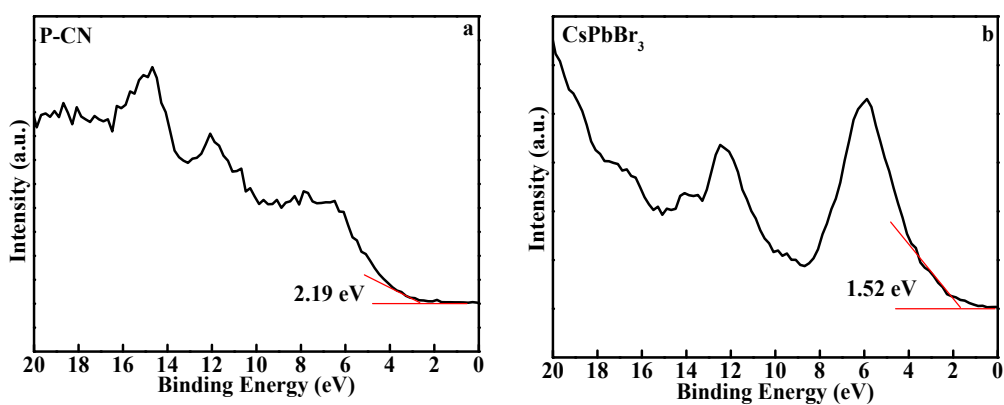

Fig. S8. XPS valence band spectra of (a) P-CN and (b) CsPbBr<sub>3</sub>.
